# Supplementary material for: Causes of stillbirth and death among children younger than 5 years in eastern Hararghe, Ethiopia: a population-based post-mortem study
Source: PubMed Central journal article supplement (PMC10282072; doi:10.1016/s2214-109x(23)00211-5), 2023-06-01
Supplement: mmc1.pdf [file mmc1.pdf]

# THE LANCET

## Global Health

### Supplementary appendix

This appendix formed part of the original submission and has been peer reviewed. We post it as supplied by the authors.

Supplement to: Madrid L, Alemu A, Seale AC, et al. Causes of stillbirth and death among children younger than 5 years in eastern Hararghe, Ethiopia: a population-based post-mortem study. *Lancet Glob Health* 2023; published online June 1. [https://doi.org/10.1016/S2214-109X\(23\)00211-5](https://doi.org/10.1016/S2214-109X(23)00211-5).

## **Appendix**

**Causes of stillbirth and death among young children in Eastern Hararghe, Ethiopia: a population-based post-mortem study.**

## Table of Contents

|                                                                                                                                                                                                            |    |
|------------------------------------------------------------------------------------------------------------------------------------------------------------------------------------------------------------|----|
| <b>Table S1.</b> Causes of death and International Classification of Diseases (ICD-10) codes (grouped into broader categories) .....                                                                       | 3  |
| <b>Table S2.</b> Maternal factors contributing to main cause of death in stillbirths and International Classification of Diseases (ICD-10) codes (grouped into broader categories).....                    | 5  |
| <b>Table S3.</b> Frequency of stillbirths, neonatal and child deaths in the target population (HDSS) that are enrolled in the study and consented for MITS (4th February 2019 to 3rd February 2021). ..... | 6  |
| <b>Figure S1:</b> Death notification diagram.....                                                                                                                                                          | 7  |
| <b>Table S4.</b> Breakdown of consent by HDSS, age at death and location of death.....                                                                                                                     | 8  |
| <b>Figure S2A:</b> Categories of all identified causes of death combined for stillbirths, neonates, and children under 5 years .....                                                                       | 10 |
| <b>Figure S2B:</b> Categories of all identified causes of death and position in the causal chain, combined for stillbirths, neonates, and children under 5 years.....                                      | 11 |
| <b>Figure S3.</b> Causal chain of events of all identified causes of death, combined for stillbirths, neonates, and children under 5 years .....                                                           | 12 |

**Table S1.** Causes of death and International Classification of Diseases (ICD-10) codes (grouped into broader categories)

| Category                                                 | Condition                                                                   | ICD-10 |
|----------------------------------------------------------|-----------------------------------------------------------------------------|--------|
| <b>Undetermined</b>                                      | Stillbirths                                                                 | P95    |
|                                                          | Neonates and children                                                       | R99    |
| <b>Preterm birth complications</b>                       | Preterm                                                                     | P07.3  |
|                                                          | Extreme immaturity                                                          | P07.2  |
|                                                          | Respiratory distress syndrome                                               | P22.0  |
|                                                          | Necrotizing enterocolitis of foetus and newborn                             | P77    |
|                                                          | Intraventricular haemorrhage                                                | P52.2  |
|                                                          | Neonatal jaundice associated with preterm delivery                          | P59.0  |
| <b>Congenital birth defects</b>                          | Chromosomal abnormality, unspecified                                        | Q99.9  |
|                                                          | Congenital hydrocephalus                                                    | Q03.9  |
|                                                          | Congenital malformation-absence of unspecified limbs                        | Q73.0  |
|                                                          | Congenital malformation syndromes predominantly affecting facial appearance | Q87.0  |
|                                                          | Neural Tube Defect-Craniorachischisis                                       | Q00.1  |
|                                                          | Neural Tube Defect-lumbar spina bifida without hydrocephalus                | Q05.7  |
|                                                          | Neural Tube Defect-lumbar spina bifida with hydrocephalus                   | Q05.2  |
|                                                          | Neural Tube Defect-thoracic spina bifida with hydrocephalus                 | Q05.1  |
|                                                          | Neural Tube Defect-Anencephaly                                              | Q00.0  |
|                                                          | Neural Tube Defect-Iniencephaly                                             | Q00.2  |
|                                                          | Polycystic kidney disease                                                   | Q61.3  |
|                                                          | Osteochondrodysplasia with defect of growth of tubular bones and spine      | Q77    |
|                                                          | Congenital malformation of the musculoskeletal system                       | Q79    |
|                                                          | Congenital malformations syndrome predominantly affecting facial appearance | Q87    |
|                                                          | Downs Syndrome, unspecified                                                 | Q90.9  |
| <b>Congenital and neonatal infections</b>                | Congenital toxoplasmosis                                                    | P37.1  |
|                                                          | Congenital pneumonia                                                        | P23.6  |
| <b>Non-infectious congenital and neonatal conditions</b> | Intrauterine hypoxia                                                        | P20.1  |
|                                                          | Extremely low birth weight                                                  | P07.0  |
|                                                          | Other low birth weight                                                      | P07.1  |
|                                                          | Meconium aspiration syndrome                                                | P24.0  |
|                                                          | Light for gestational age                                                   | P05.0  |
|                                                          | Slow foetal growth                                                          | P05.9  |
|                                                          | Small for gestational age                                                   | P05.1  |
|                                                          | Hydrops fetalis not due to haemolytic disease                               | P83.2  |
|                                                          | Hydrops fetalis due to other and unspecified haemolytic disease             | P56.9  |
|                                                          | Birth asphyxia, severe                                                      | P21.0  |
|                                                          | Birth asphyxia, moderate                                                    | P21.1  |
|                                                          | Birth asphyxia, unspecified                                                 | P21.9  |
|                                                          | Hypoxic ischemic encephalopathy of newborn                                  | P91.6  |
|                                                          | Other apnoea of the newborn                                                 | P28.4  |

|                                           |                                                                                  |           |
|-------------------------------------------|----------------------------------------------------------------------------------|-----------|
|                                           | Disseminated intravascular coagulation                                           | P60       |
|                                           | Kernicterus                                                                      | P57.0     |
| <b>Malnutrition</b>                       | Marasmus or severe protein-energy malnutrition                                   | E41 - E43 |
|                                           | Kwashiorkor                                                                      | E40       |
|                                           | Marasmic kwashiorkor                                                             | E42       |
|                                           | Moderate protein-energy malnutrition                                             | E44.0     |
|                                           | Stunting                                                                         | E45       |
| <b>Sepsis</b>                             | Sepsis due to other specified pathogen                                           | A41.8     |
|                                           | Bacterial sepsis of the newborn due to other specific pathogens                  | P36.8     |
|                                           | Bacterial sepsis of the newborn due to group B Streptococcus                     | P36.0     |
|                                           | Sepsis due to group A Streptococcus                                              | A40.0     |
|                                           | Sepsis due to other Gram negatives organisms                                     | A41.5     |
|                                           | Sepsis due to Salmonella                                                         | A02.1     |
|                                           | Bacterial sepsis of the newborn due to <i>Escherichia coli</i>                   | P36.4     |
|                                           | Sepsis, unspecified                                                              | A41.9     |
| <b>Diarrheal diseases</b>                 | Gastroenteritis/Enteritis due to Enteroinvasive <i>Escherichia coli</i>          | A04.2     |
|                                           | Gastroenteritis/Enteritis due to Enteropathogenic <i>Escherichia coli</i> (EPEC) | A04.0     |
|                                           | Gastroenteritis/Enteritis due to Enterotoxigenic <i>Escherichia coli</i> (ETEC)  | A04.1     |
|                                           | Cholera due to <i>Vibrio cholerae</i>                                            | A00.0     |
|                                           | Other unspecified gastroenteritis                                                | A09.0     |
| <b>Lower respiratory tract infections</b> | Pneumonia due to Respiratory Syncytial virus                                     | J12.1     |
|                                           | Pneumonia due to <i>S. pneumoniae</i>                                            | J13       |
|                                           | Pneumonia due to <i>Klebsiella spp.</i>                                          | J15.0     |
|                                           | Pneumonia due to group B Streptococcus                                           | J15.3     |
|                                           | Pneumonia due to other Gram negatives organisms                                  | J15.6     |
|                                           | Pneumonia due to other specified bacteria                                        | J16.8     |
|                                           | Aspiration pneumonia                                                             | J69.0     |
| <b>Meningitis/Encephalitis</b>            | Meningococcal meningitis                                                         | A39.0     |
|                                           | Pneumococcal meningitis                                                          | G00.1     |
|                                           | Streptococcal meningitis                                                         | G00.2     |
|                                           | Meningitis due to other specified bacterial                                      | G00.8     |
| <b>Other diseases</b>                     | Portal hypertension                                                              | K76.6     |
|                                           | Acute and subacute hepatic failure                                               | K72.0     |
|                                           | Measles                                                                          | B05       |
|                                           | Accidental suffocation or strangulation in bed                                   | W75       |
|                                           | Hypovolemic shock                                                                | R57.1     |
|                                           | Disseminated intravascular coagulation                                           | D65       |
|                                           | Febrile convulsions                                                              | R56.0     |
|                                           | Hypothermia                                                                      | T68       |
|                                           | Anaemia                                                                          | D64       |
|                                           | Hypoglycaemia                                                                    | E16.2     |
|                                           | Hydrocephalus, unspecified                                                       | G91.9     |
|                                           | Cellulitis or abscess of the mouth                                               | K12.2     |

**Table S2.** Maternal factors contributing to main cause of death in stillbirths and International Classification of Diseases (ICD-10) codes (grouped into broader categories)

| <b>Category</b>                                                                                                                                      | <b>Maternal factor</b>                                                                                         | <b>ICD-10</b> |
|------------------------------------------------------------------------------------------------------------------------------------------------------|----------------------------------------------------------------------------------------------------------------|---------------|
| <b>Foetus affected by complications of placenta, cord, and membranes</b>                                                                             | Foetus and newborn affected by other forms of placental separation and haemorrhage (Abruptio placentae)        | P02.1         |
|                                                                                                                                                      | Foetus affected by other and unspecified morphological and functional abnormalities of placenta                | P02.2         |
|                                                                                                                                                      | Foetus and newborn affected by other specified complications of labour and delivery                            | P03.8         |
|                                                                                                                                                      | Premature rupture of membranes, onset of labour after 24 hours                                                 | O42.1         |
|                                                                                                                                                      | Premature rupture of membranes, labour delayed by therapy                                                      | O42.2         |
|                                                                                                                                                      | Foetus and newborn affected by prolapsed cord                                                                  | P02.4         |
|                                                                                                                                                      | Foetus and newborn affected by placental transfusion syndromes                                                 | P02.3         |
|                                                                                                                                                      | Foetus and newborn affected by chorioamnionitis                                                                | P02.7         |
|                                                                                                                                                      | Prolonged pregnancy                                                                                            | O48           |
|                                                                                                                                                      | Foetus and newborn affected by oligohydramnios                                                                 | P01.2         |
| <b>Foetus and newborn affected by multiple pregnancy</b>                                                                                             | Foetus and newborn affected by multiple pregnancy                                                              | P01.5         |
| <b>Uterine rupture during delivery</b>                                                                                                               | Uterine rupture during delivery                                                                                | O71.1         |
| <b>Foetus and newborn affected by other malpresentation, malposition, disproportion and other specified complications during labour and delivery</b> | Foetus and newborn affected by other malpresentation, malposition and disproportion during labour and delivery | P03.1         |
| <b>Foetus affected by maternal hypertensive disorders or diabetes</b>                                                                                | Foetus and newborn affected by breech delivery and extraction                                                  | P03.0         |
|                                                                                                                                                      | Preeclampsia/Eclampsia/ haemolysis, elevated liver enzymes, low platelet count (HELLP) syndrome                | P00.0         |
|                                                                                                                                                      | Pre-existing type 1 diabetes mellitus                                                                          | O24.0         |
|                                                                                                                                                      | Pre-existing type 2 diabetes mellitus                                                                          | O24.1         |

**Table S3.** Frequency of stillbirths, neonatal and child deaths in the target population (HDSS) that are enrolled in the study and consented for MITS (4th February 2019 to 3rd February 2021).

| Site               | Age category          | Events among HDSS residents | Mortality rate in HDSS (per 1000) | Deaths notified and eligible for the study | Deaths with consent for MITS |
|--------------------|-----------------------|-----------------------------|-----------------------------------|--------------------------------------------|------------------------------|
| Ethiopia All Sites | Live births           | 11,017                      | -                                 | -                                          | -                            |
|                    | Stillbirths           | 173                         | 15                                | 164                                        | 116                          |
|                    | Neonatal deaths       | 132                         | 12                                | 145                                        | 59                           |
|                    | Infant/Child deaths   | 1,064                       | 97                                | 132                                        | 20                           |
|                    | <b>TOTAL</b>          | <b>1,369</b>                | <b>124</b>                        | <b>441</b>                                 | <b>195</b>                   |
| Haramaya HDSS      | Live births           | 3,210                       | 3,210                             | -                                          | -                            |
|                    | Stillbirths           | 32                          | 10                                | 45                                         | 41                           |
|                    | Neonatal deaths       | 6                           | 2                                 | 22                                         | 11                           |
|                    | Infant/Child deaths   | 135                         | 42                                | 7                                          | 1                            |
|                    | <b>TOTAL HARAMAYA</b> | <b>173</b>                  | <b>54</b>                         | <b>74</b>                                  | <b>53</b>                    |
| Harar HDSS         | Live births           | 1,237                       | 1,237                             | -                                          | -                            |
|                    | Stillbirths           | 12                          | 10                                | 62                                         | 46                           |
|                    | Neonatal deaths       | 2                           | 2                                 | 64                                         | 35                           |
|                    | Infant/Child deaths   | 23                          | 19                                | 12                                         | 3                            |
|                    | <b>TOTAL HARAR</b>    | <b>37</b>                   | <b>30</b>                         | <b>138</b>                                 | <b>84</b>                    |
| Kersa HDSS         | Live births           | 6,570                       | 6,570                             | -                                          | -                            |
|                    | Stillbirths           | 129                         | 19                                | 57                                         | 30                           |
|                    | Neonatal deaths       | 124                         | 19                                | 59                                         | 12                           |
|                    | Infant/Child deaths   | 906                         | 138                               | 113                                        | 16                           |
|                    | <b>TOTAL KERSA</b>    | <b>1049</b>                 | <b>160</b>                        | <b>229</b>                                 | <b>58</b>                    |

HDSS: Health & Demographic Surveillance System; CHAMPS: Child Health and Mortality Prevention Surveillance; MITS: Minimally Invasive Tissue Sampling

**Figure S1: Death notification diagram**

Figure S1: Death notification diagram

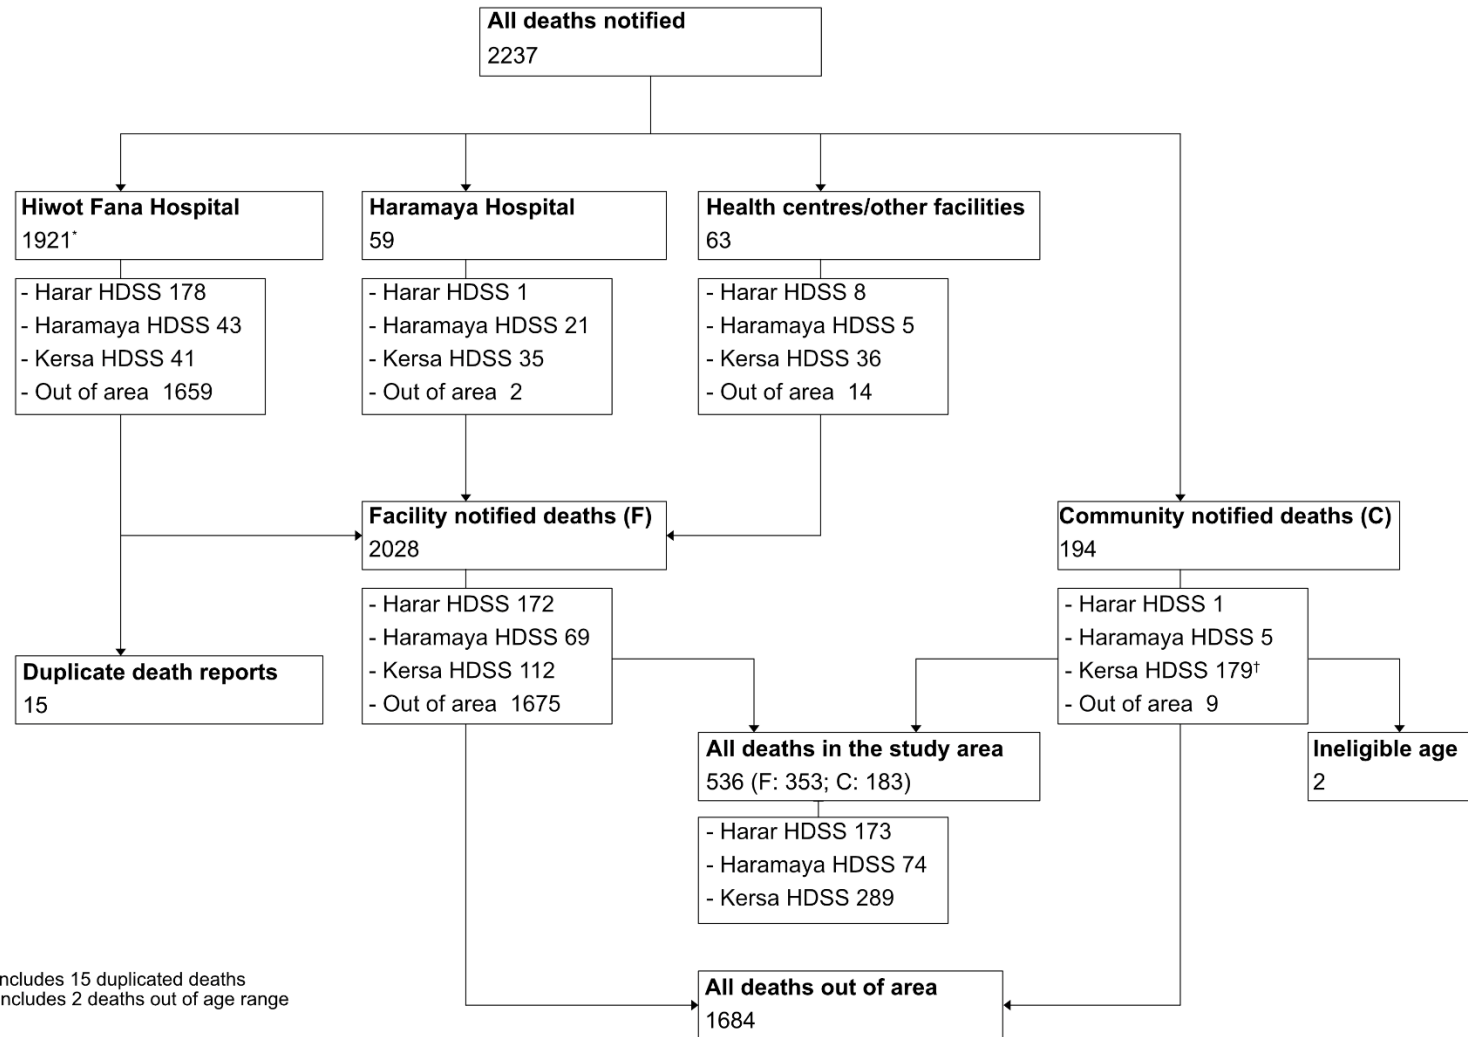

\* includes 15 duplicated deaths  
 † includes 2 deaths out of age range



**Table S4.** Breakdown of consent by HDSS, age at death and location of death.

|                          | ALL HDSS (n=307) |     |           | Haramaya HDSS |    |           | Harar HDSS |     |            | Kersa HDSS |     |           |
|--------------------------|------------------|-----|-----------|---------------|----|-----------|------------|-----|------------|------------|-----|-----------|
|                          | n                | N   | %         | n             | N  | %         | n          | N   | %          | n          | N   | %         |
| <b>Age group</b>         |                  |     |           |               |    |           |            |     |            |            |     |           |
| Stillbirths              | 116              | 139 | <b>83</b> | 41            | 44 | <b>93</b> | 46         | 61  | <b>75</b>  | 30         | 34  | <b>88</b> |
| Neonates                 | 59               | 105 | <b>56</b> | 11            | 21 | <b>52</b> | 35         | 63  | <b>56</b>  | 12         | 21  | <b>57</b> |
| Children 1-59 months     | 20               | 63  | <b>32</b> | 1             | 3  | <b>33</b> | 3          | 9   | <b>33</b>  | 16         | 51  | <b>31</b> |
| <b>Location of death</b> |                  |     |           |               |    |           |            |     |            |            |     |           |
| Facility                 | 175              | 264 | <b>66</b> | 52            | 66 | <b>79</b> | 83         | 132 | <b>63</b>  | 39         | 65  | <b>60</b> |
| Community                | 20               | 43  | <b>47</b> | 1             | 2  | <b>50</b> | 1          | 1   | <b>100</b> | 19         | 41  | <b>46</b> |
| <b>All</b>               | 195              | 307 | <b>64</b> | 53            | 68 | <b>78</b> | 84         | 133 | <b>63</b>  | 58         | 106 | <b>55</b> |

HDSS: Health & Demographic Surveillance System

**Table S5.** Maternal factors contributing the main cause of death found in 59 stillbirths

| Main cause of stillbirth       | Complications of placenta, cord, and membranes <sup>†</sup> |           | Maternal hypertensive disorders or diabetes |           | Malposition, malpresentation, disproportion, other complications of labour or delivery |           | Multiple pregnancy |          | Uterine rupture during delivery |          |
|--------------------------------|-------------------------------------------------------------|-----------|---------------------------------------------|-----------|----------------------------------------------------------------------------------------|-----------|--------------------|----------|---------------------------------|----------|
|                                | n                                                           | %         | n                                           | %         | n                                                                                      | %         | n                  | %        | n                               | %        |
| Perinatal asphyxia or hypoxia  | 22                                                          | 37        | 13                                          | 22        | 7                                                                                      | 12        | 0                  | 0        | 1                               | 2        |
| Neural tube defects            | 0                                                           | 0         | 0                                           | 0         | 1                                                                                      | 2         | 0                  | 0        | 0                               | 0.0      |
| Other congenital birth defects | 0                                                           | 0         | 0                                           | 0         | 0                                                                                      | 0.0       | 0                  | 0        | 1                               | 2        |
| Small for gestational age      | 3                                                           | 5         | 5                                           | 8         | 0                                                                                      | 0.0       | 2                  | 3        | 0                               | 0        |
| Sepsis                         | 1                                                           | 2         | 0                                           | 0         | 0                                                                                      | 0.0       | 1                  | 2        | 0                               | 0        |
| Undetermined                   | 1                                                           | 2         | 1                                           | 2         | 0                                                                                      | 0.0       | 0                  | 0        | 0                               | 0        |
| <b>TOTAL (N=59)</b>            | <b>27</b>                                                   | <b>46</b> | <b>19</b>                                   | <b>32</b> | <b>8</b>                                                                               | <b>13</b> | <b>3</b>           | <b>5</b> | <b>2</b>                        | <b>4</b> |

<sup>†</sup>Placenta available for 47 stillbirths among 114 (41%) included in this analysis.

The denominator to calculate the % for each figure is N=59, the number of stillbirths where a maternal contributing factor was found.

**Figure S2A:** Categories of all identified causes of death combined for stillbirths, neonates, and children under 5 years

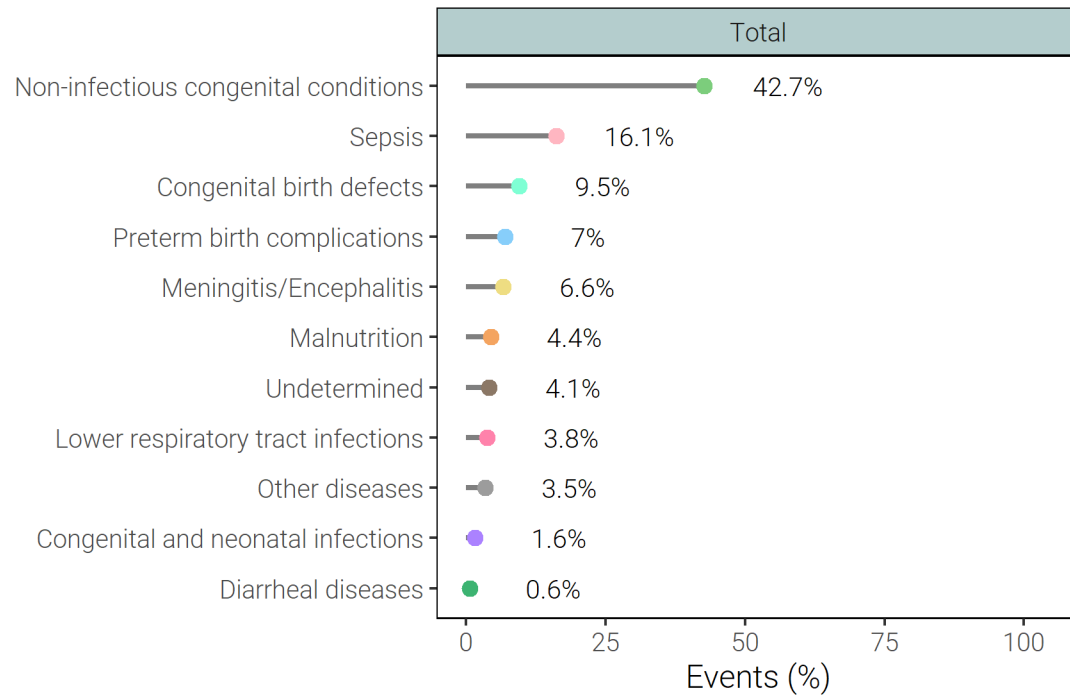

*Non-infectious congenital and neonatal conditions:* includes intrauterine hypoxia, birth asphyxia, low birth weight, meconium aspiration syndrome, light/small for gestational age, hydrops fetalis, apnoea and kernicterus.

*Congenital birth defects:* includes neural tube defects, congenital hydrocephalus, chromosomal abnormalities and other unspecified congenital malformations.

*Preterm birth complications:* includes prematurity, respiratory distress syndrome, necrotizing enterocolitis of foetus and newborn, intraventricular haemorrhage and neonatal jaundice of prematurity.

*Others:* includes diseases that are not very common, such as portal hypertension, hepatic failure, measles, hypovolemic shock, disseminated intravascular coagulation, febrile convulsions, hypothermia, anaemia, hypoglycaemia, hydrocephalus, cellulitis and accidental suffocation.

**Figure S2B:** Categories of all identified causes of death and position in the causal chain, combined for stillbirths, neonates, and children under 5 years

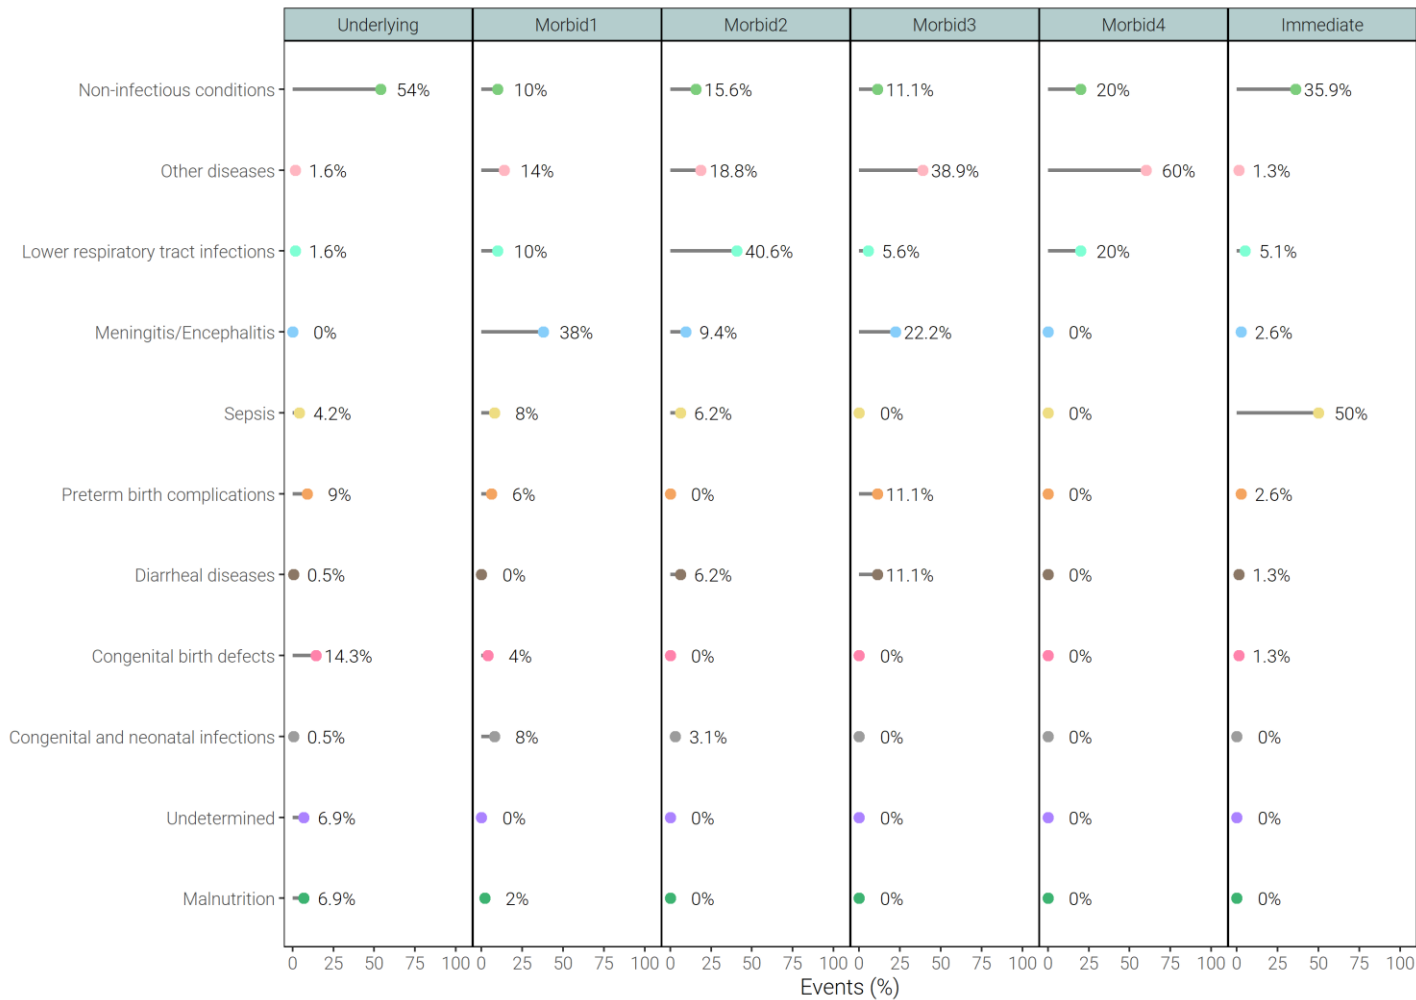

*When more than one condition contributing to death is determined, the entire chain of events is documented; this included the underlying, comorbid conditions (in the causal pathway between underlying and immediate) and immediate factors. The DeCoDe procedure permits one underlying cause of death and one immediate cause but it allows multiple comorbid causes if identified.*

**Figure S3.** Causal chain of events of all identified causes of death, combined for stillbirths, neonates, and children under 5 years

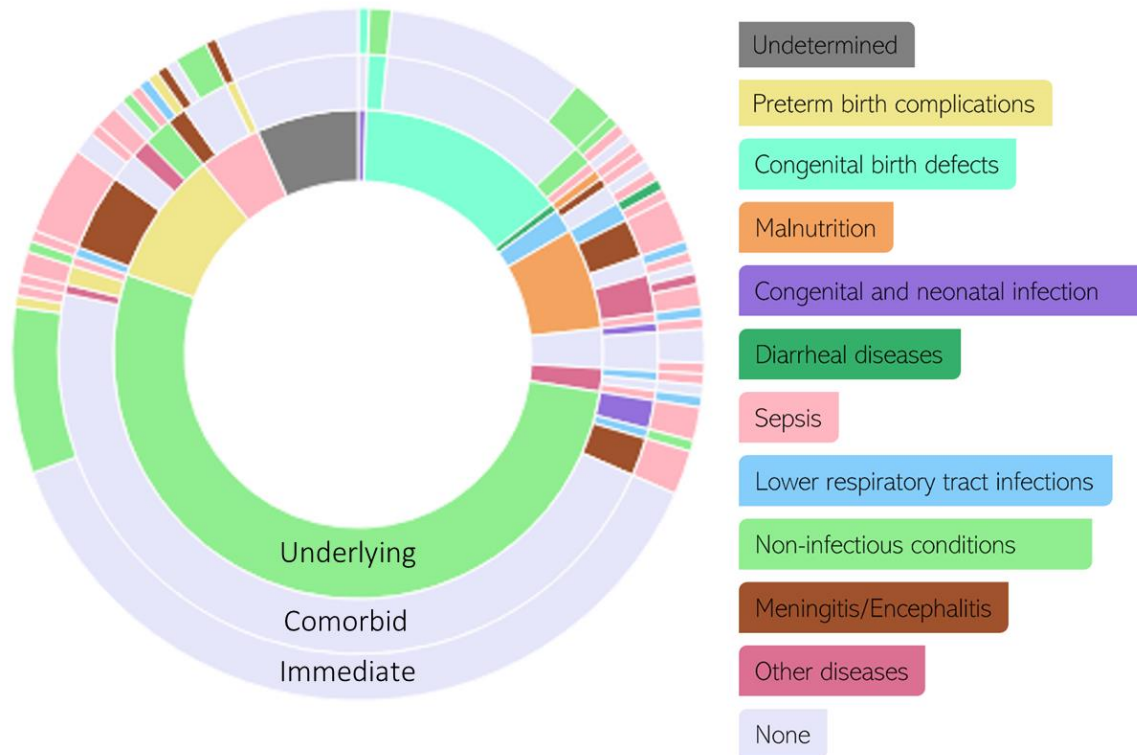

*All cases must have an underlying cause. This underlying cause may be the unique cause of death identified or may trigger a chain of events. This included the underlying cause (one per case), comorbid conditions -in the causal pathway between underlying and immediate- (none, one or multiple for each case) and immediate cause of death (none or one per case).*
